# Supplementary material
Source: Elsevier journal article supplement (https://www.sciencedirect.com/science/article/pii/S2530064422000128)
Supplement: mmc2 [file S2530064422000128:mmc2.doc]

**Long-term persistence of the large mammal lowland tapir is at risk in the largest Atlantic forest corridor**

**Supplementary File S1 - Tables S1-S6 and Figures S1-S2.**

**Table S1.** Sampling sites of lowland tapirs (*Tapirus terrestris*) in Atlantic forest, Brazil.

| **Sampling site name** | **Abbreviation** | **Latitude** | **Longitude** | **Altitude** |
| --- | --- | --- | --- | --- |
| Serra do Mar State Park - Santa Virginia Nucleus | NSV | -23.26311 | -45.16004 | 300 - 1,200 m |
| Serra do Mar State Park - Caraguatatuba Nucleus | NCA | -23.63143 | -45.51211 | 0 - 900 m |
| Juréia-Itatins Ecological Station | EEJI | -24.46112 | -47.24200 | 0 - 900 m |
| Carlos Botelho State Park | PECB | -24.14922 | -47.96200 | 300 - 1,200 m |
| Intervales State Park | PEI | -24.35640 | -48.33508 | 300 - 1,200 m |

**Table S2.** Sampling records of lowland tapirs (*Tapirus terrestris*) in Atlantic forest, Brazil

| **Sample Code** | **Sampling site** | **Latitude** | **Longitude** | **Used for genetic analyses (with at least 5 loci successfully amplified)*** |
| --- | --- | --- | --- | --- |
| SV3 | NSV | -45.08213 | -23.31648 | X |
| SV4 | NSV | -45.09982 | -23.32332 | X |
| SV5 | NSV | -45.08879 | -23.31336 | X |
| SV6 | NSV | -45.12459 | -23.34275 | X |
| SV7 | NSV | -45.09818 | -23.33651 |  |
| SV8 | NSV | -45.09573 | -23.34224 | X |
| SV9 | NSV | -45.09611 | -23.34346 | X |
| SV10 | NSV | -45.09756 | -23.34412 | X |
| SV11 | NSV | -45.10171 | -23.35155 | X |
| SV13 | NSV | -45.10368 | -23.35426 | X |
| SV14 | NSV | -45.10479 | -23.35606 | X |
| SV15 | NSV | -45.10512 | -23.35631 | X |
| SV16 | NSV | -45.10606 | -23.35715 | X |
| SV17 | NSV | -45.08714 | -23.31480 | X |
| SV18 | NSV | -45.08831 | -23.31320 | X |
| SV19 | NSV | -45.09983 | -23.32266 | X |
| SV21 | NSV | -45.10034 | -23.34649 | X |
| SV22 | NSV | -45.10072 | -23.34744 | X |
| SV23 | NSV | -45.10225 | -23.35240 | X |
| SV24 | NSV | -45.13288 | -23.35752 | X |
| SV25 | NSV | -45.13289 | -23.35797 | X |
| SV26 | NSV | -45.13289 | -23.35797 | X |
| SV27 | NSV | -45.13298 | -23.35798 |  |
| SV28 | NSV | -45.13291 | -23.35825 | X |
| SV29 | NSV | -45.13293 | -23.35825 |  |
| SV30 | NSV | -45.23958 | -23.44422 | X |
| SV31 | NSV | -45.08579 | -23.31790 |  |
| SV32 | NSV | -45.09573 | -23.32034 |  |
| SV33 | NSV | -45.08688 | -23.31700 |  |
| SV34 | NSV | -45.13488 | -23.35071 |  |
| SV35 | NSV | -45.13487 | -23.35071 |  |
| SV36 | NSV | -45.09107 | -23.31026 |  |
| SV37 | NSV | -45.11197 | -23.31550 |  |
| SV38 | NSV | -45.06082 | -23.30876 |  |
| SV39 | NSV | -45.06020 | -23.30911 |  |
| SV40 | NSV | -45.54990 | -23.30789 |  |
| SV41 | NSV | -45.09825 | -23.33646 |  |
| SV42 | NSV | -45.06086 | -23.30885 |  |
| SV43 | NSV | -45.05627 | -23.31463 | X |
| SV44 | NSV | -45.08553 | -23.34267 |  |
| SV45 | NSV | -45.06088 | -23.30885 |  |
| SV46 | NSV | -45.05688 | -23.31421 |  |
| SV47 | NSV | -45.05678 | -23.31430 |  |
| SV48 | NSV | -45.09737 | -23.34389 |  |
| SV49 | NSV | -45.10228 | -23.35062 |  |
| SV50 | NSV | -45.10285 | -23.35266 |  |
| SV51 | NSV | -45.10293 | -23.35275 |  |
| SV52 | NSV | -45.10296 | -23.35273 |  |
| SV53 | NSV | -45.10297 | -23.35275 |  |
| SV54 | NSV | -45.10298 | -23.35274 |  |
| SV55 | NSV | -45.10295 | -23.35274 |  |
| SV56 | NSV | -45.10294 | -23.35282 |  |
| SV57 | NSV | -45.10614 | -23.35722 |  |
| SV58 | NSV | -45.10613 | -23.35718 |  |
| SV59 | NSV | -45.10611 | -23.35719 |  |
| CB7 | PECB | -47.98893 | -24.06325 |  |
| CB8 | PECB | -47.98803 | -24.06438 | X |
| CB9 | PECB | -47.99105 | -24.05799 | X |
| CB10 | PECB | -47.98546 | -24.06197 | X |
| CB11 | PECB | -47.98170 | -24.07414 | X |
| CB13 | PECB | -47.97886 | -24.05900 | X |
| CB14 | PECB | -47.98826 | -24.06494 | X |
| CB15 | PECB | -47.98724 | -24.06326 | X |
| CB16 | PECB | -47.98635 | -24.06181 | X |
| CB17 | PECB | -47.99094 | -24.05799 | X |
| CB18 | PECB | -47.96730 | -24.06647 | X |
| CB19 | PECB | -47.98725 | -24.06325 | X |
| CB20 | PECB | -47.99518 | -24.05436 | X |
| CB21 | PECB | -47.91597 | -24.00464 | X |
| CB29 | PECB | -47.99094 | -24.05799 | X |
| CB30 | PECB | -47.98826 | -24.06494 | X |
| CB31 | PECB | -47.99094 | -24.05799 | X |
| CB32 | PECB | -47.98834 | -24.06099 | X |
| CB33 | PECB | -47.98721 | -24.06319 | X |
| CB34 | PECB | -47.88286 | -24.07946 | X |
| CB35 | PECB | -47.98780 | -24.05847 | X |
| CB36 | PECB | -47.99225 | -24.06716 | X |
| CB37 | PECB | -47.99823 | -24.06586 | X |
| CB38 | PECB | -47.99875 | -24.06548 | X |
| CB39 | PECB | -47.99788 | -24.06618 | X |
| CB40 | PECB | -47.99557 | -24.06651 | X |
| CB41 | PECB | -47.99823 | -24.06586 |  |
| CB42 | PECB | -47.99823 | -24.06586 |  |
| CB43 | PECB | -47.99788 | -24.06618 | X |
| CB44 | PECB | -47.99557 | -24.06651 | X |
| CB45 | PECB | -47.98780 | -24.05847 | X |
| CB46 | PECB | -47.98819 | -24.05833 | X |
| CB47 | PECB | -47.99557 | -24.06651 | X |
| CB48 | PECB | -47.99592 | -24.05234 | X |
| CB49 | PECB | -47.99529 | -24.05295 |  |
| CB50 | PECB | -47.99104 | -24.05800 | X |
| CB51 | PECB | -47.97679 | -24.06487 |  |
| CB52 | PECB | -47.98825 | -24.06496 | X |
| CB53 | PECB | -47.99557 | -24.06651 | X |
| CB54 | PECB | -47.98715 | -24.06327 |  |
| CB55 | PECB | -47.99529 | -24.05295 | X |
| CB56 | PECB | -47.98825 | -24.06496 | X |
| CB57 | PECB | -47.98721 | -24.06319 | X |
| CB58 | PECB | -47.98890 | -24.06595 | X |
| CB59 | PECB | -47.99642 | -24.05453 |  |
| CB60 | PECB | -47.99104 | -24.05800 | X |
| CB61 | PECB | -47.98780 | -24.05847 |  |
| JU1 | EEJI | -24.46112 | -47.24200 |  |
| JU2 | EEJI | -47.16111 | -24.50000 | X |
| JU3 | EEJI | -24.46112 | -47.24200 | X |
| JU4 | EEJI | -47.18333 | -24.51667 |  |
| A1 | EEJI | -24.46112 | -47.24200 |  |
| A2 | EEJI | -24.46112 | -47.24200 | X |
| A3 | EEJI | -24.46112 | -47.24200 | X |
| A4 | EEJI | -24.46112 | -47.24200 |  |
| A5 | EEJI | -24.46112 | -47.24200 | X |
| A6 | EEJI | -24.46112 | -47.24200 | X |
| A7 | EEJI | -24.46112 | -47.24200 | X |
| A8 | EEJI | -24.46112 | -47.24200 |  |
| C1 | NCA | -45.56605 | -23.62041 | X |
| C2 | NCA | -45.57348 | -23.61720 | X |
| C3 | NCA | -45.56783 | -23.62088 |  |
| C11 | NCA | -45.57343 | -23.61732 |  |
| C12 | NCA | -45.57580 | -23.62492 | X |
| C13 | NCA | -45.56782 | -23.62067 |  |
| C35 | NCA | -45.57458 | -23.62292 |  |
| C45 | NCA | -45.63494 | -23.69005 |  |
| I9 | PEI | -24.35640 | -48.33508 | X |
| I22 | PEI | -24.35640 | -48.33508 |  |
| I44 | PEI | -24.35640 | -48.33508 | X |

*These samples represent 75 distinct lowland tapir individuals.

**Table S3.** Probability of identity (P(ID)) and Probability of identity considering the chance of related individuals (P(ID)sibs).

| P(ID) for Increasing Locus Combinations | | | | | | | | |
| --- | --- | --- | --- | --- | --- | --- | --- | --- |
| **1** | **1+2** | **1+2+3** | **1+2+3+4** | **1+2+3+4+5** | **1+2+3+4+5+6** | **1+2+3+4+5+6+7** | **1+2+3+4+5+6+7+8** | **1+2+3+4+5+6+7+8+9** |
| 2.3-01 | 1.3-02 | 3.2-03 | 2.7-04 | 3.4-05 | 1.3-06 | 5.8-08 | 9.9-10 | 1.1-10 |
|  | | | | | | | | |
| P(ID)sibs for Increasing Locus Combinations | | | | | | | | |
| **1** | **1+2** | **1+2+3** | **1+2+3+4** | **1+2+3+4+5** | **1+2+3+4+5+6** | **1+2+3+4+5+6+7** | **1+2+3+4+5+6+7+8** | **1+2+3+4+5+6+7+8+9** |
| 5.0-01 | 1.8-01 | 9.4-02 | 3.7-02 | 1.6-02 | 5.3-03 | 1.8-03 | 5.5-04 | 2.3-04 |

**Table S4.** Characterization of the Tter10 microsatellite locus isolated from lowland tapir (*Tapirus terrestris*).

| Locus Name | Primer sequence (5´ - 3´) | Motif | Size range (bp) | Na | Ho | He | GenBank accession number |
| --- | --- | --- | --- | --- | --- | --- | --- |
| Tter10 | ATACCATTCTATCCCTCCATC  GGTTGACCAGTTTAATGCAG | (AC)9 | 204-226 | 11 | 0.50 | 0.70 | MT876102 |

Genetic information based on 66 individuals of lowland tapir (*Tapirus terrestris*) analyzed here. Na: number of alleles; Ho: observed heterozygosity; He: expected heterozygosity; bp: base pairs.

**Table S5.** Null allele frequency per locus.

| Locus name | | | | | | | | |
| --- | --- | --- | --- | --- | --- | --- | --- | --- |
| Tter3 | Tter4 | Tter5 | Tter9 | Tter10 | Tter11 | Tter13 | Tter14 | Tter18 |
| 0.09 | 0.34 | 0.07 | 0.21 | 0.15 | 0.18 | 0.32 | 0.26 | 0.33 |

**Table S6.** Detailed information of effective population size (Ne) for both populations obtained using the 9 microsatellite loci.

|  | Coastal population (N=34) | | | |  | Inland population (N=41) | | | | |
| --- | --- | --- | --- | --- | --- | --- | --- | --- | --- | --- |
| Lowest Allele Frequency Used | No singleton* | 0.05 | 0.02 | 0.010 |  | No singleton* | | 0.05 | 0.02 | 0.01 |
| Harmonic Mean Sample Size | 18.9 | 18.1 | 18.9 | 19.0 |  | 22.2 | 20.9 | | 21.1 | 21.6 |
| Independent Comparisons | 1176 | 968 | 1499 | 1526 |  | 652 | 458 | | 799 | 873 |
| Overall r^2 | 0.069 | 0.071 | 0.066 | 0.066 |  | 0.080 | 0.088 | | 0.079 | 0.075 |
| Expected r^2 Samples | 0.057 | 0.059 | 0.057 | 0.056 |  | 0.049 | 0.052 | | 0.051 | 0.049 |
| Estimated Ne | 24.8 | 23.6 | 29.4 | 29.0 |  | 7.6 | 6.2 | | 8.7 | 9.7 |
| 95% CI (Parametric) | 15.7-46.8 | 14.3-48.7 | 18.8-56.1 | 18.754.1 |  | 4.9-11.1 | 3.2-10 | | 6-12.5 | 6.9-13.9 |

*Exclude the singleton alleles for the Ne estimates.


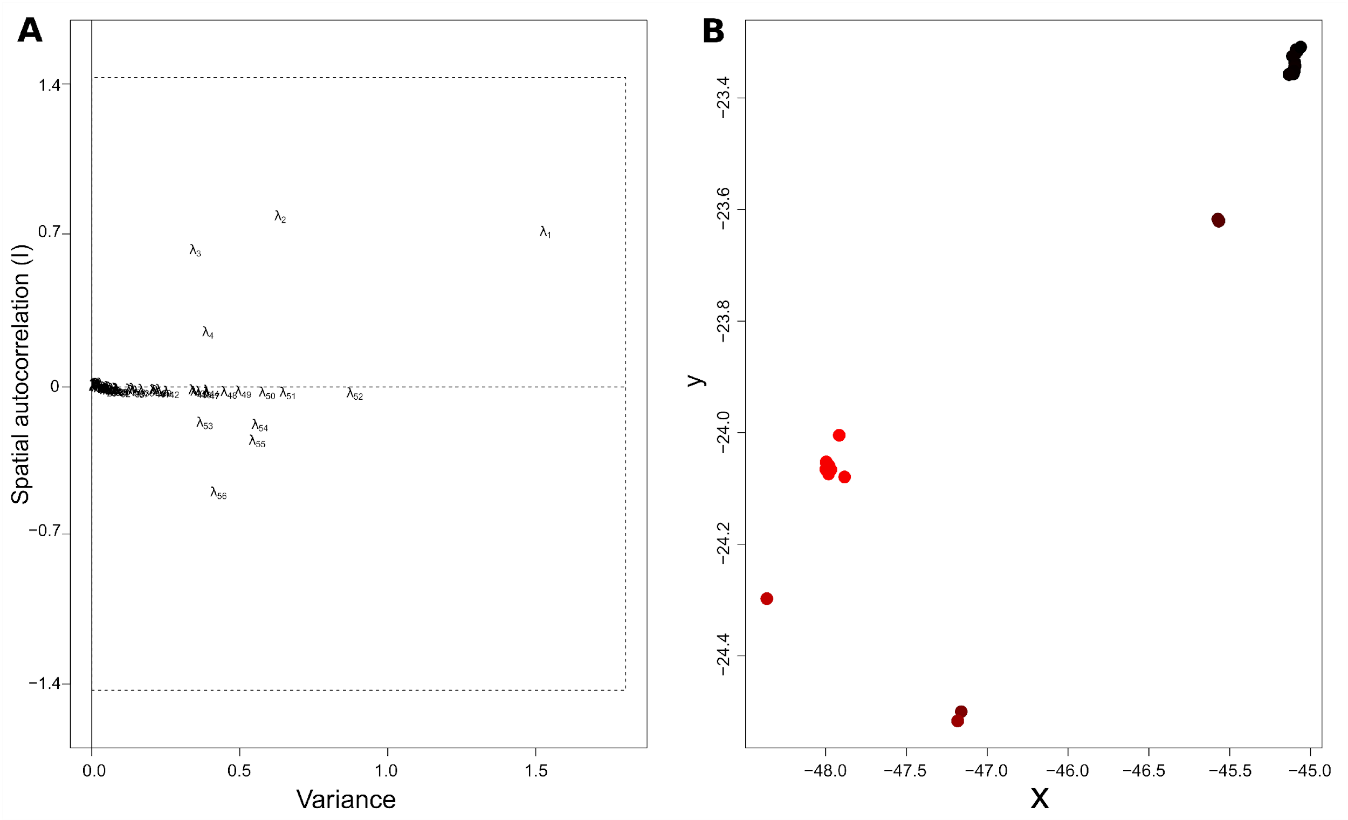


**Fig. S1** Genetic structure as assessed by sPCA of lowland tapirs (*Tapirus terrestris*) in Atlantic forest, Brazil. A- Scree plot showing sPCA eigenvalues with variance on the x-axis and spatial autocorrelation on the y-axis. The first global score (λ1) can be easily distinguished from the other scores and may be interpreted. B-The results show the first Principal Component (PC) and the respective mappings of cluster membership (colors represent the membership probability for each cluster).


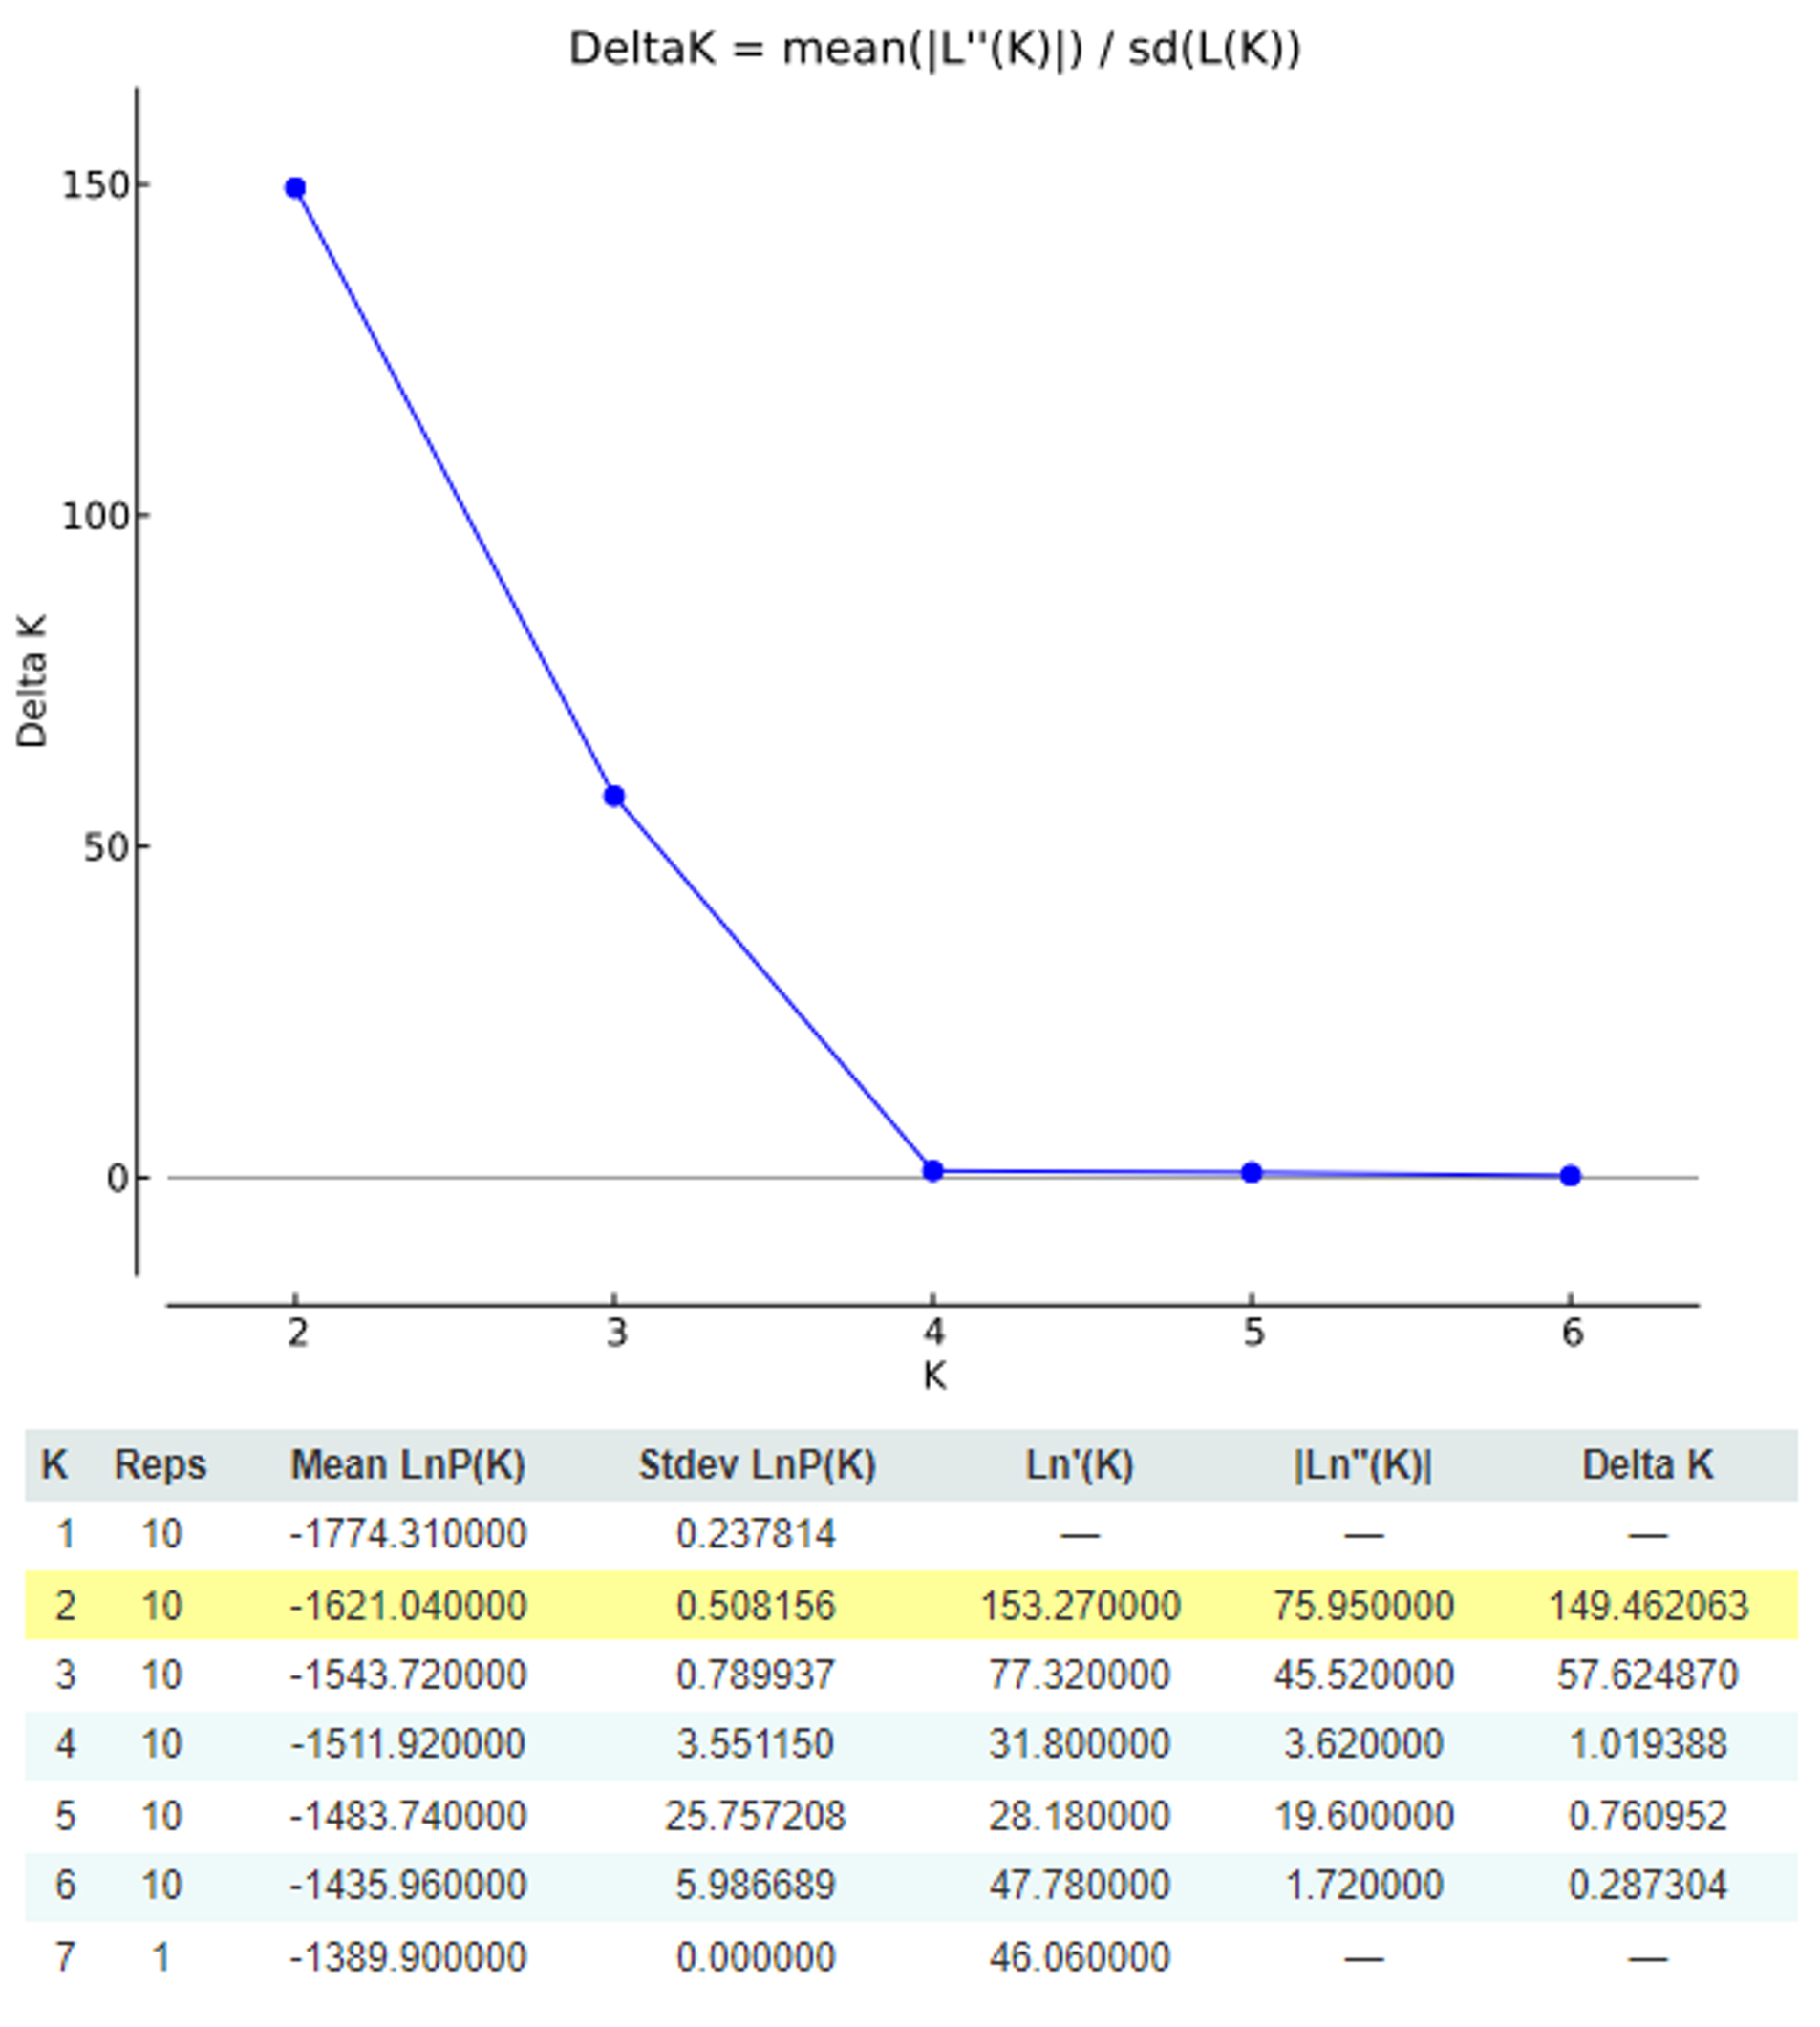


**Fig. S2.** Delta K (ΔK) and the log-likelihood values for the most likely number of genetic clusters.
